# Supplementary material for: Superassembling of Bi2Te3hierarchical nanostructures for enhanced thermoelectric performance
Source: Royal Society of Chemistry journal article supplement (doi:10.1039/c5ta00911a), 2015-01-01
Supplement: c5ta00911a1.pdf [file c5ta00911a1.pdf]

# Supporting Information

## Superassembling of $\text{Bi}_2\text{Te}_3$ Hierarchical Nanostructures for Enhanced Thermoelectric Performance

*Hsiu-Cheng Chang, Tsung-Han Chen, Wha-Tzong Whang, and Chun-Hua Chen\**

Department of Materials Science and Engineering, National Chiao Tung University  
1001 Ta-Hsueh Rd., Hsin-Chu, 30010 Taiwan, R.O.C.

E-mail address: [ChunHuaChen@mail.nctu.edu.tw](mailto:ChunHuaChen@mail.nctu.edu.tw)

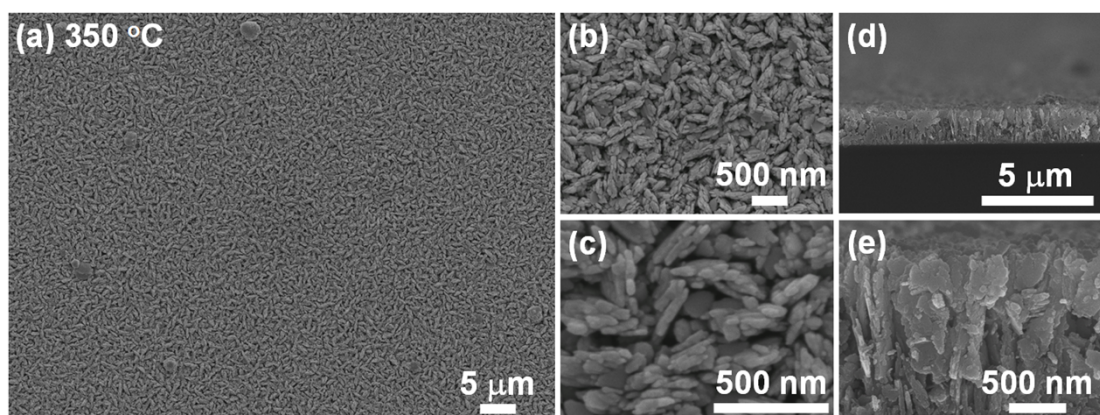

**Figure S1.** (a)-(c) The top-view SEM images indicate that the  $\text{Bi}_2\text{Te}_3$  superassemblies deposited at 350 °C are uniformly composed of spindle-like hierarchical nanostructures. (d)-(e) The cross-sectional SEM images confirm that the nanoarchitectures are vertically-aligned on the  $\text{SiO}_2/\text{Si}$  substrate.

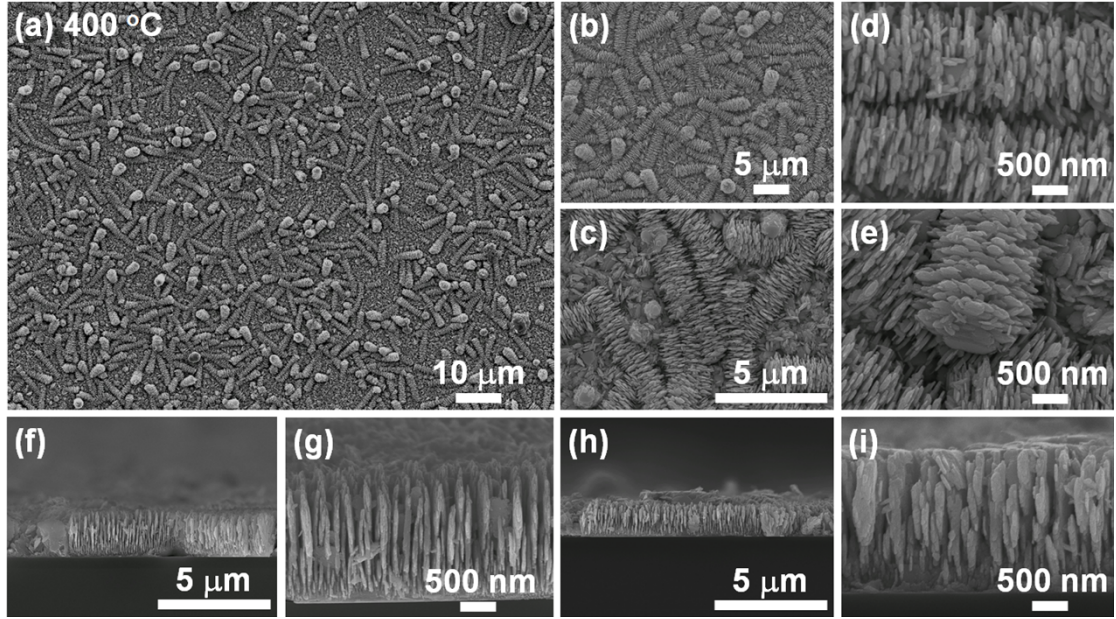

**Figure S2.** (a)-(c) The low-magnification top-view SEM images indicate that the  $\text{Bi}_2\text{Te}_3$  superassemblies prepared at 400 °C are uniformly composed of large amount of worm-like hierarchical nanostructures. The high-magnification top-view SEM images of the (d) body and (e) head of single selected worm-like hierarchical nanostructure evidence that the building blocks are 1-D nanorods. The cross-sectional SEM images shown in (f) and (h) obviously indicate that the 1-D nanorods are amazingly side-by-side aligned on the  $\text{SiO}_2/\text{Si}$  substrate. The bottom epitaxial domains shown in (g) and (h) not only dominate the growth of the upper superassemblies, but provide special low-resistance channels for carriers transporting.

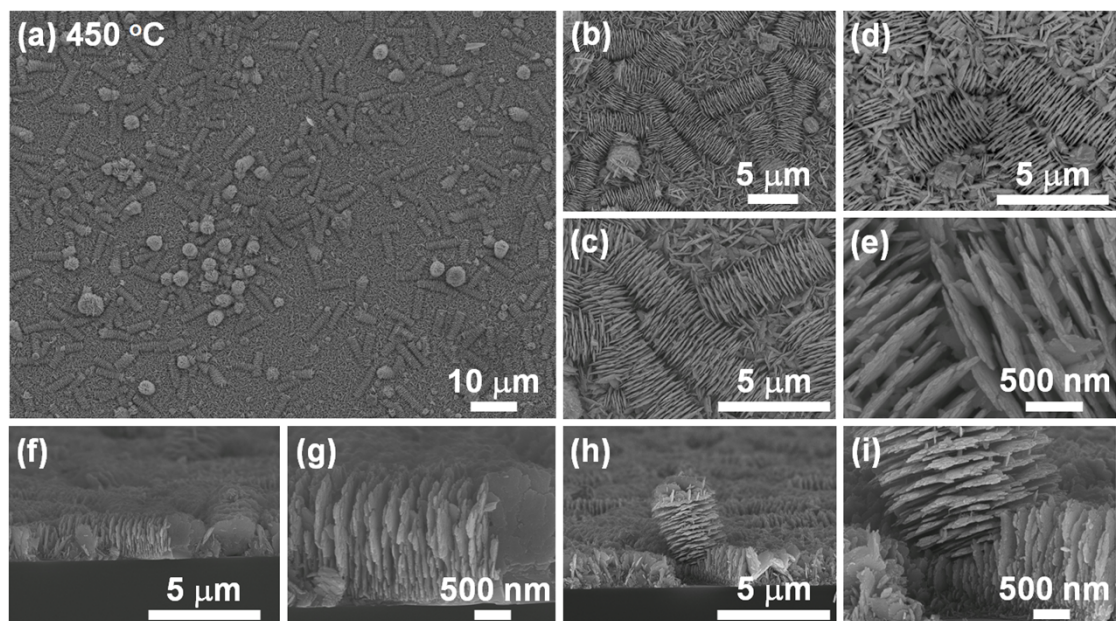

**Figure S3.** (a)-(d) The low-magnification top-view SEM images indicate that the  $\text{Bi}_2\text{Te}_3$  superassemblies formed at 450 °C are composed of worm-like hierarchical nanostructures. (e) The high-magnification top-view SEM image confirms that the building blocks are 2-D nanoflakes. The cross-sectional SEM images shown in (f) and (g) evidence the vertically aligned 2-D nanoflakes on the  $\text{SiO}_2/\text{Si}$  substrate. (h)-(i) Only a minority of the 2-D nanoflakes are not vertically aligned.

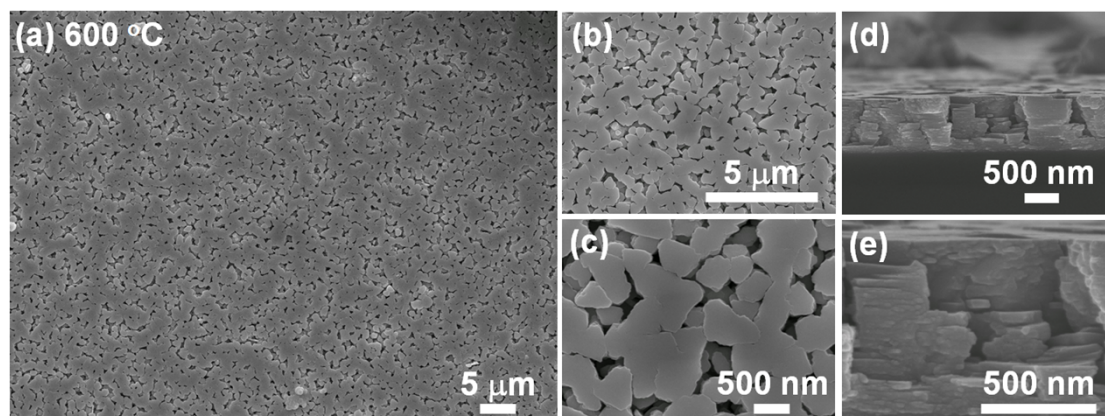

**Figure S4.** (a)-(c) The top-view SEM images clearly show numerous nanoscopic holes periodically embedded in the  $\text{Bi}_2\text{Te}_3$  superassemblies prepared at 600 °C. (d)-(e) The corresponding cross-sectional SEM images indicate that the 2-D nanoflakes are horizontally-lying on the  $\text{SiO}_2/\text{Si}$  substrate.

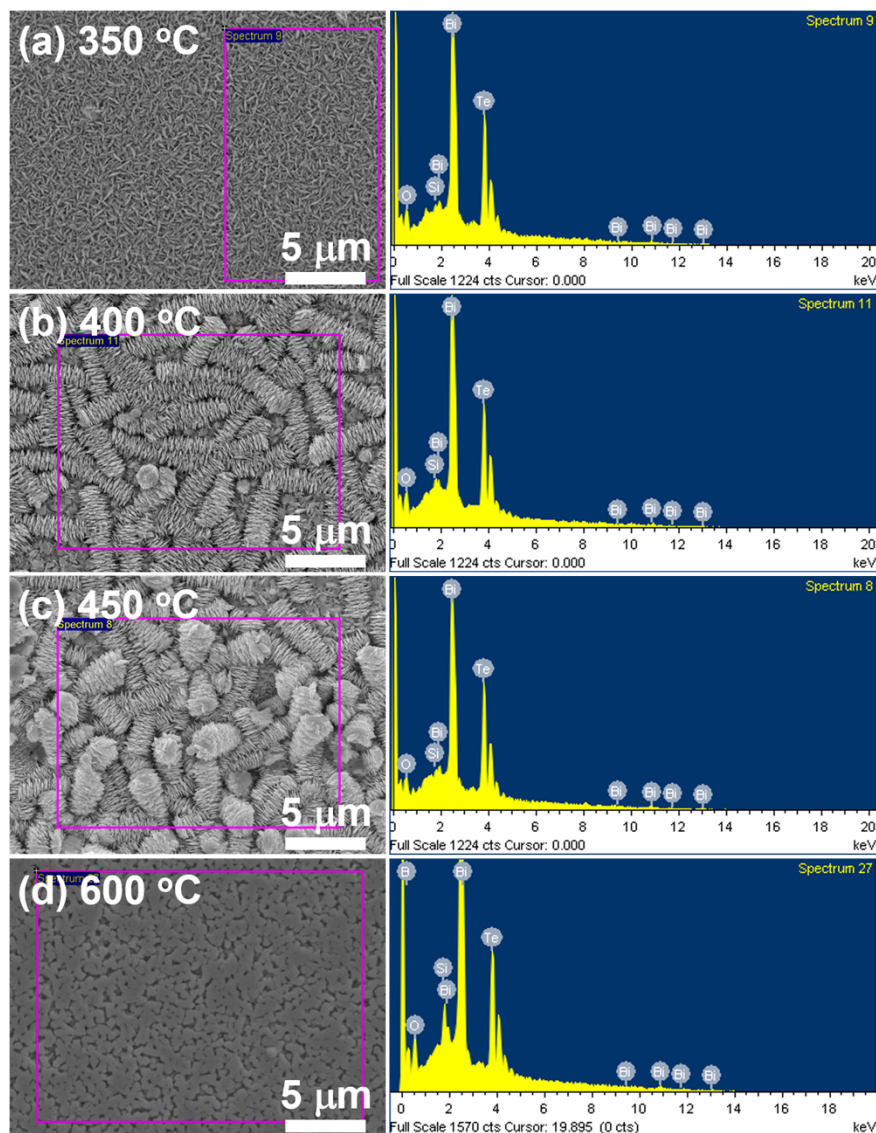

**Figure S5.** The low-magnification top-view SEM images of the  $\text{Bi}_2\text{Te}_3$  superassemblies fabricated at (a) 350  $^{\circ}\text{C}$ , (b) 400  $^{\circ}\text{C}$ , (c) 450  $^{\circ}\text{C}$ , and (d) 600  $^{\circ}\text{C}$ . The corresponding EDS spectra clearly show Bi, Te, Si, and O signals originated from the  $\text{Bi}_2\text{Te}_3$  superassemblies and  $\text{SiO}_2/\text{Si}$  substrate. This result is consistent with the XPS investigations.

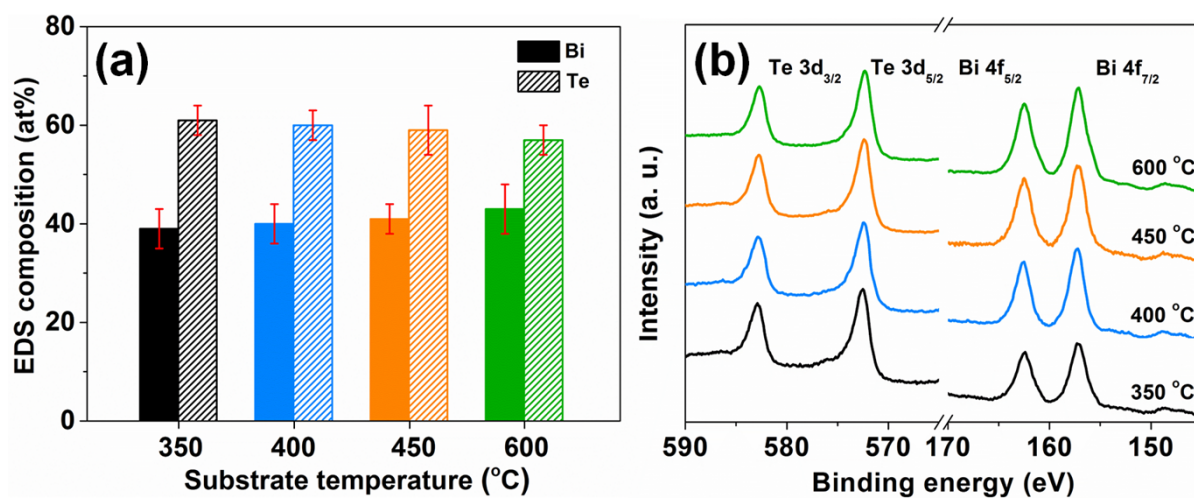

**Figure S6.** (a) The EDS compositional analyses of the  $\text{Bi}_2\text{Te}_3$  superassemblies fabricated at various temperatures. (b) The XPS spectra of the Bi 4f and Te 3d states evidence the absence of oxidation states.
